# Supplementary material
Source: ML conference proceedings conference paper supplement (https://openaccess.thecvf.com/content/WACV2024/html/Bar-Shalom_Weakly-Supervised_Representation_Learning_WACV_2024_paper.html)
Supplement: Supplementary file 1 [file Bar-Shalom_Weakly-Supervised_Representation_Learning_WACV_2024_supplemental.zip]

## A. PennAction Breakdown

In this section, we present a detailed breakdown of **LRProp** performance on each action in the PennAction dataset. The results are summarized in Table 4.

| Dataset        | $\tau$ | Progress | AP@   |       |       |       |       |       |       |       | Classification@ |       |       |       |       |       | DTW-A |
|----------------|--------|----------|-------|-------|-------|-------|-------|-------|-------|-------|-----------------|-------|-------|-------|-------|-------|-------|
|                |        |          | K=1   | K=5   | K=10  | K=15  | K=20  | K=25  | K=30  | 5     | 10              | 25    | 50    | 75    | 100   |       |       |
| squat          | 99.58  | 97.08    | 90.9  | 90.73 | 90.22 | 90.11 | 89.95 | 89.83 | 89.74 | 91.19 | 90.43           | 91    | 91.07 | 91    | 91.57 | 87.4  |       |
| pushup         | 99.08  | 92.7     | 92.58 | 92.53 | 92.39 | 92.32 | 92.2  | 92.12 | 92.02 | 90.77 | 89.27           | 91.86 | 93.17 | 93.25 | 93.19 | 92.35 |       |
| tennis serve   | 98.66  | 95.54    | 90.05 | 89.44 | 89.2  | 89.03 | 88.76 | 88.58 | 88.47 | 89.4  | 91.31           | 91.52 | 91.17 | 91.74 | 91.69 | 87.85 |       |
| tennis forhand | 98.85  | 88.28    | 92.14 | 91.03 | 90.89 | 90.61 | 90.47 | 90.36 | 90.3  | 92.53 | 92.44           | 93.14 | 92.68 | 93.14 | 93.08 | 89.66 |       |
| situp          | 99.33  | 95.39    | 96.83 | 96.81 | 96.7  | 96.63 | 96.51 | 96.41 | 96.4  | 96.81 | 96.72           | 97.04 | 96.97 | 97.08 | 97.08 | 95.74 |       |
| pullup         | 99.23  | 96.8     | 96.73 | 96.52 | 96.46 | 96.39 | 96.33 | 96.23 | 96.18 | 96.4  | 96.34           | 95.66 | 95.54 | 96.13 | 96.27 | 95.25 |       |
| jumping jacks  | 98.63  | 97.02    | 91.91 | 91.84 | 91.74 | 91.67 | 91.44 | 91.03 | 90.68 | 92.11 | 93.41           | 93.58 | 93.58 | 93.7  | 93.76 | 90.08 |       |
| golf swing     | 98.92  | 98.19    | 95.02 | 95.3  | 94.98 | 94.64 | 94.46 | 94.26 | 94.14 | 94.92 | 94.92           | 94.97 | 95.28 | 95.37 | 95.4  | 92.69 |       |
| bowl           | 98.84  | 76.21    | 92.33 | 90.65 | 89.73 | 89.13 | 88.56 | 88.22 | 87.85 | 84.57 | 85.02           | 84.53 | 84.9  | 85.25 | 85.68 | 83.88 |       |
| benchpress     | 99.32  | 95.14    | 94.33 | 93.96 | 93.9  | 93.75 | 93.65 | 93.55 | 93.49 | 91.38 | 93.81           | 94.98 | 95.11 | 95.19 | 95.33 | 92.57 |       |
| baseball swing | 99.2   | 94.9     | 91.61 | 92.11 | 91.87 | 91.88 | 91.78 | 91.63 | 91.49 | 97.05 | 89.59           | 92.49 | 93.03 | 93.19 | 93.11 | 90.07 |       |
| baseball pitch | 99.35  | 98.05    | 92.92 | 92.91 | 92.73 | 92.59 | 92.55 | 92.43 | 92.32 | 92.18 | 93.11           | 94.62 | 94.94 | 95.18 | 95.29 | 90.93 |       |
| clean and jerk | 99.2   | 87.64    | 88.67 | 88.24 | 87.84 | 87.66 | 87.5  | 87.33 | 87.2  | 87.89 | 88.62           | 90.31 | 91.14 | 90.99 | 90.8  | 83.59 |       |

Table 4. **PennAction breakdown.** A breakdown of the performance of **LRProp** on each of the actions contained in the PennAction dataset, using various evaluation metrics: Phase Classification@% (Classification@%), Phase Progression (Progress), Kendall’s Tau ( $\tau$ ), Average Precision@K (AP@K) and DTW Accuracy (DTW A).

## B. Implementation Details

In our model, we use a ResNet-50 [21] pretrained by BYOL [16] as a frame-wise spatial encoder. We use a 7-layer Transformer encoder [39] with a hidden size of 256 and 8 heads to model temporal context. We set  $\sigma^2 = 10$ , recall Equations (2), (7), and  $\tau = 0.1$ , recall Equation (1). We use the Adam optimizer with a learning rate of  $10^{-4}$  and a weight decay of  $10^{-5}$ , and we apply a cosine decay schedule without restarts [29] to the learning rate. We fix a batch size of 2, and train for 300 epochs all considered datasets. We use the same spatial augmentations and temporal sampling technique as in [7, 8]. The number of sampled frames,  $T$ , and the regularization parameters,  $\lambda_1$ ,  $\lambda_2$ , recall Equation (12), are given in Table 5.

| <i>Dataset</i> | <i>Action class</i> | <i>T</i> | $\lambda_1$ | $\lambda_2$ |
|----------------|---------------------|----------|-------------|-------------|
| PennAction     | jumping jacks       | 20       | 0.01        | 0.4         |
|                | tennis serve        | 40       |             | 0.003       |
|                | tennis forhand      |          |             |             |
|                | baseball swing      |          |             |             |
|                | bowl                | 60       |             | 0.001       |
|                | situp               | 80       |             | 0.4         |
|                | benchpress          |          |             |             |
|                | baseball pitch      |          |             |             |
|                | golf swing          |          |             | 1.6         |
|                | pushup              |          |             |             |
|                | squat               |          |             | 0.8         |
|                | pullup              |          |             |             |
|                | clean and jerk      |          |             |             |
| Pouring        | -                   | 240      |             |             |

Table 5. Hyper-parameters of **LRProp** regarding each dataset.
